# Supplementary material for: A Microphysiological Model to Mimic the Placental Remodeling during Early Stage of Pregnancy under Hypoxia-Induced Trophoblast Invasion
Source: MDPI journal article supplement (doi:10.3390/biomimetics9050289), 2024-05-12
Supplement: s1 [file s1]

**Supporting Information for**

**A Microphysiological Model to Mimic the Placental Remodeling during Early Stage of  
Pregnancy under Hypoxia Induced Trophoblast Invasion**

Seorin Jeong<sup>1</sup>, Ahmed Fuwad<sup>1</sup>, Sunhee Yoon<sup>2</sup>, Tae-Joon Jeon<sup>2,3,4,†</sup>, Sun Min Kim<sup>1,2,3,†</sup>

<sup>1</sup> Department of Mechanical Engineering, Inha university, 100, Inha-ro, Michuhol-gu, Incheon 22212, Republic of Korea

<sup>2</sup> Department of Biological Science and Bioengineering, Inha University, 100, Inha-ro, Michuhol-gu, Incheon 22212, Republic of Korea

<sup>3</sup> Biohybrid Systems Research Center, Inha University, 100, Inha-ro, Michuhol-gu, Incheon 22212, Korea

<sup>4</sup> Department of Biological Engineering, Inha university, 100, Inha-ro, Michuhol-gu, Incheon 22212, Republic of Korea

Corresponding Authors:

Tae-Joon Jeon: [tjjeon@inha.ac.kr](mailto:tjjeon@inha.ac.kr)

Sun Min Kim: [sunmk@inha.ac.kr](mailto:sunmk@inha.ac.kr)

**Table S1** Summarization of different experimental techniques employed to study the placenta development.

| Model                     | Benefit                                                                                                                                                                                                      | Limitations                                                                                                                                                                                                                      | Application                       | Ref     |
|---------------------------|--------------------------------------------------------------------------------------------------------------------------------------------------------------------------------------------------------------|----------------------------------------------------------------------------------------------------------------------------------------------------------------------------------------------------------------------------------|-----------------------------------|---------|
| <b>2D culture</b>         | <ul style="list-style-type: none"> <li>- Sustainable cell culture</li> <li>- Maintain in vitro characteristics.</li> <li>- Cell-cell interaction studies</li> <li>- Enable signal pathway studies</li> </ul> | <ul style="list-style-type: none"> <li>- Cell type limitations</li> <li>- Challenging to study between cells and membrane</li> <li>- No physiological relevance</li> </ul>                                                       | Novel platform / Functional study | [1–9]   |
|                           |                                                                                                                                                                                                              |                                                                                                                                                                                                                                  | Toxicity/drug test                | [10–12] |
|                           |                                                                                                                                                                                                              |                                                                                                                                                                                                                                  | Substance transfer                | [13,14] |
| <b>Animal model</b>       | <ul style="list-style-type: none"> <li>- Longitudinal sample available</li> <li>- Anatomical similarities</li> </ul>                                                                                         | <ul style="list-style-type: none"> <li>- Expensive to maintain</li> <li>- Difficult handling</li> <li>- Difficult to construct suitable animal model</li> </ul>                                                                  | Novel platform / Functional study | [15,16] |
|                           |                                                                                                                                                                                                              |                                                                                                                                                                                                                                  | Toxicity/drug test                | [17–20] |
|                           |                                                                                                                                                                                                              |                                                                                                                                                                                                                                  | Substance transfer                | [20,21] |
| <b>Placenta-on-a-chip</b> | <ul style="list-style-type: none"> <li>- Mimics in vivo signaling.</li> <li>- Correct tissue organization</li> <li>- Enables coculture conditions</li> </ul>                                                 | <ul style="list-style-type: none"> <li>- Hard to acquire samples for further analysis</li> <li>- Small cell number leads to limited phenotypic assay</li> <li>- Difficult to culture cells on both sides the membrane</li> </ul> | Novel platform / Functional study | [22–26] |
|                           |                                                                                                                                                                                                              |                                                                                                                                                                                                                                  | Toxicity/drug test                | [27,28] |
|                           |                                                                                                                                                                                                              |                                                                                                                                                                                                                                  | Substance transfer                | [29–32] |

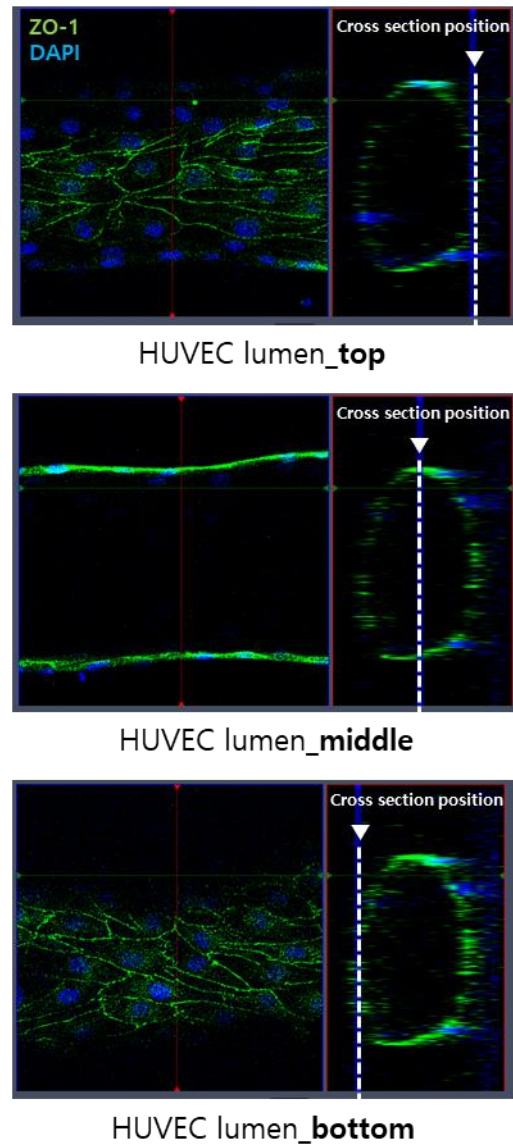

**Figure S1.** Confocal 3D images with cross sectional view of HUVECs vessel. Green and blue show ZO-1 and DAPI staining, respectively. Well-formed cylindrical structure with a hollow interior, like *in vivo* blood vessel was confirmed.

## References

1. Rytting, E.; Cartwright; Poulsen; Nielsen; Pojana; Knudsen; Saunders In Vitro Placental Model Optimization for Nanoparticle Transport Studies. *International Journal of Nanomedicine* **2012**, *7*, 497
2. Duzyj, C.M.; Barnea, E.R.; Li, M.; Huang, S.J.; Krikun, G.; Paidas, M.J. Preimplantation Factor Promotes First Trimester Trophoblast Invasion. *American Journal of Obstetrics and Gynecology* **2010**, *203*, 402.e1-402.e4
3. Nathenson, M.J.; Barysaukas, C.M.; Nathenson, R.A.; Regine, W.F.; Hanna, N.; Sausville, E. Surgical Resection for Recurrent Retroperitoneal Leiomyosarcoma and Liposarcoma. *World Journal of Surgical Oncology* **2018**, *16*, 1–11
4. Müller, E.K.; Gräfe, C.; Wiekhorst, F.; Bergemann, C.; Weidner, A.; Dutz, S.; Clement, J.H. Magnetic Nanoparticles Interact and Pass an in Vitro Co-Culture Blood-Placenta Barrier Model. *Nanomaterials* **2018**, *8*, 108
5. Nishiguchi, A.; Gilmore, C.; Sood, A.; Matsusaki, M.; Collett, G.; Tannetta, D.; Sargent, I.L.; McGarvey, J.; Halemani, N.D.; Hanley, J.; et al. In Vitro Placenta Barrier Model Using Primary Human Trophoblasts, Underlying Connective Tissue and Vascular Endothelium. *Biomaterials* **2019**, *192*, 140–148
6. Blanco, O.; Leno-Durán, E.; Morales, J.C.; Olivares, E.G.; Ruiz-Ruiz, C. Human Decidual Stromal Cells Protect Lymphocytes from Apoptosis. *Placenta* **2009**, *30*, 677–685
7. Tan, L.; Chen, Z.; Sun, F.; Zhou, Z.; Zhang, B.; Wang, B.; Chen, J.; Li, M.; Xiao, T.; Neuman, R.I.; et al. Placental Trophoblast-Specific Overexpression of Chemerin Induces Preeclampsia-like Symptoms. *Clinical Science* **2022**, *136*
8. Wong, M.K.; Li, E.W.; Adam, M.; Selvaganapathy, P.R.; Raha, S. Establishment of an in Vitro Placental Barrier Model Cultured under Physiologically Relevant Oxygen Levels. *Molecular human reproduction* **2020**, *26*, 353–365
9. Walsh, S.W. Plasma from Preeclamptic Women Stimulates Transendothelial Migration of Neutrophils. *Reproductive Sciences* **2009**, *16*, 320–325
10. da Costa Garcia Filho, F.; da Luz, F.S.; Nascimento, L.F.C.; Satyanarayana, K.G.; Drelich, J.W.; Monteiro, S.N. Mechanical Properties of Boehmeria Nivea Natural Fabric Reinforced Epoxy Matrix Composite Prepared by Vacuum-Assisted Resin Infusion Molding. *Polymers* **2020**, *12*, 1311
11. Tannetta, D.S.; Sargent, I.L.; Linton, E.A.; Redman, C.W.G. Vitamins C and E Inhibit Apoptosis of Cultured Human Term Placenta Trophoblast. *Placenta* **2008**, *29*, 680–690
12. Orendi, K.; Gauster, M.; Moser, G.; Meiri, H.; Huppertz, B. Effects of Vitamins C and E, Acetylsalicylic Acid and Heparin on Fusion, Beta-HCG and PP13 Expression in BeWo Cells. *Placenta* **2010**, *31*, 431–438
13. Huang, X.; Lüthi, M.; Ontsouka, E.C.; Kallol, S.; Baumann, M.U.; Surbek, D. V.; Albrecht, C. Establishment of a Confluent Monolayer Model with Human Primary Trophoblast Cells: Novel Insights into Placental Glucose Transport. *Molecular Human Reproduction* **2016**, *22*, 442–456

14. Aengenheister, L.; Keevend, K.; Muoth, C.; Schönenberger, R.; Diener, L.; Wick, P.; Buerki-Thurnherr, T. An Advanced Human in Vitro Co-Culture Model for Translocation Studies across the Placental Barrier. *Scientific Reports* **2018**, *8*, 5388
15. Barry, J.S.; Anthony, R. V. The Pregnant Sheep as a Model for Human Pregnancy. *Theriogenology* **2008**, *69*, 55–67
16. Thompson, L.P.; Pence, L.; Pinkas, G.; Song, H.; Telugu, B.P. Placental Hypoxia during Early Pregnancy Causes Maternal Hypertension and Placental Insufficiency in the Hypoxic Guinea Pig Model. *Biology of Reproduction* **2016**, *95*, 1–10
17. Zhang, B.; Tan, L.; Yu, Y.; Wang, B.; Chen, Z.; Han, J.; Li, M.; Chen, J.; Xiao, T.; Ambati, B.K.; et al. Placenta-Specific Drug Delivery by Trophoblast-Targeted Nanoparticles in Mice. *Theranostics* **2018**, *8*, 2765–2781
18. Andersen, M.H.G.; Zuri, G.; Knudsen, L.E.; Mathiesen, L. Placental Transport of Parabens Studied Using an Ex-Vivo Human Perfusion Model. *Placenta* **2021**, *115*, 121–128
19. Smith, J.A.; Gaikwad, A.; Mosley, S.; Coffey, L.; Cegelski, J.; Alcorn, J.L.; Ramin, S.M.; Refuerzo, J.S. Utilization of an Ex Vivo Human Placental Perfusion Model to Predict Potential Fetal Exposure to Carboplatin during Pregnancy. *American Journal of Obstetrics and Gynecology* **2014**, *210*, 275.e1-275.e9
20. Durhan, G.; Ünverdi, H.; Deveci, C.; Büyüksireci, M.; Karakaya, J.; Değirmenci, T.; Bayrak, A.; Koşar, P.; Hücümenoğlu, S.; Ergün, Y. Placental Elasticity and Histopathological Findings in Normal and Intra-Uterine Growth Restriction Pregnancies Assessed with Strain Elastography in Ex Vivo Placenta. *Ultrasound in Medicine and Biology* **2017**, *43*, 111–118
21. Berveiller, P.; Mir, O.; Vinot, C.; Bonati, C.; Duchene, P.; Giraud, C.; Gil, S.; Treluyer, J.M. Transplacental Transfer of Oseltamivir and Its Metabolite Using the Human Perfused Placental Cotyledon Model. *American Journal of Obstetrics and Gynecology* **2012**, *206*
22. Pu, Y.; Gingrich, J.; Veiga-Lopez, A. A 3-Dimensional Microfluidic Platform for Modeling Human Extravillous Trophoblast Invasion and Toxicological Screening. *Lab on a Chip* **2021**, *21*, 546–557
23. Mosavati, B.; Oleinikov, A. V.; Du, E. Development of an Organ-on-a-Chip-Device for Study of Placental Pathologies. *International Journal of Molecular Sciences* **2020**, *21*, 1–12
24. Park, J.Y.; Mani, S.; Clair, G.; Olson, H.M.; Paurus, V.L.; Ansong, C.K.; Blundell, C.; Young, R.; Kanter, J.; Gordon, S.; et al. A Microphysiological Model of Human Trophoblast Invasion during Implantation. *Nature Communications* **2022**, *13*
25. Richardson, L.S.; Kim, S.; Han, A.; Menon, R. Modeling Ascending Infection with a Feto-Maternal Interface Organ-on-Chip. *Lab on a Chip* **2020**, *20*, 4486–4501
26. Barrett, D.W.; John, R.K.; Thrassivoulou, C.; Mata, A.; Deprest, J.A.; Becker, D.L.; David, A.L.; Chowdhury, T.T. Targeting Mechanotransduction Mechanisms and Tissue Weakening Signals in the Human Amniotic Membrane. *Scientific Reports* **2019**, *9*, 1–11
27. Radnaa, E.; Richardson, L.S.; Sheller-Miller, S.; Baljinnyam, T.; De Castro Silva, M.; Kumar Kammala, A.; Urrabaz-Garza, R.; Kechichian, T.; Kim, S.; Han, A.; et al. Extracellular Vesicle

- Mediated Feto-Maternal HMGB1 Signaling Induces Preterm Birth. *Lab on a Chip* **2021**, *21*, 1956–1973
28. Yu, F.; Hunziker, W.; Choudhury, D. Engineering Microfluidic Organoid-on-a-Chip Platforms. *Micromachines* **2019**, *10*, 165
  29. Richardson, L.; Gnecco, J.; Ding, T.; Osteen, K.; Rogers, L.M.; Aronoff, D.M.; Menon, R. Fetal Membrane Organ-On-Chip: An Innovative Approach to Study Cellular Interactions. *Reproductive Sciences* **2020**, *27*, 1562–1569
  30. Boos, J.A.; Misun, P.M.; Brunoldi, G.; Furer, L.A.; Aengenheister, L.; Modena, M.; Rousset, N.; Buerki-Thurnherr, T.; Hierlemann, A. Microfluidic Co-Culture Platform to Recapitulate the Maternal–Placental–Embryonic Axis. *Advanced Biology* **2021**, *5*, 2100609
  31. Kreuder, A.E.; Bolaños-Rosales, A.; Palmer, C.; Thomas, A.; Geiger, M.A.; Lam, T.; Amler, A.K.; Markert, U.R.; Lauster, R.; Kloeke, L. Inspired by the Human Placenta: A Novel 3D Bioprinted Membrane System to Create Barrier Models. *Scientific Reports* **2020**, *10*, 1–14
  32. Kuo, C.Y.; Shevchuk, M.; Opfermann, J.; Guo, T.; Santoro, M.; Fisher, J.P.; Kim, P.C.W. Trophoblast–Endothelium Signaling Involves Angiogenesis and Apoptosis in a Dynamic Bioprinted Placenta Model. *Biotechnology and Bioengineering* **2019**, *116*, 181–192
